# Supplementary material for: Systemic and airway T cell dynamics with influenza-specific immune recovery by cystic fibrosis elexacaftor/tezacaftor/ivacaftor therapy
Source: Research Square preprint supplement (doi:10.21203/rs.3.rs-7912659/v1), 2025-11-12
Supplement: Supplementary file 1 [file c3d1c37bcc68e4bf508dfaef.pdf]

**Supplementary material for the research article:**

**Systemic and airway T cell dynamics with influenza-specific immune recovery by cystic fibrosis elexacaftor/tezacaftor/ivacaftor therapy**

**Including 5 supplemental figures and 2 supplemental tables**

Elli Mouchtaridi<sup>1,a</sup>, Aleksandra Kowalik<sup>2,3,a</sup>, Elisa JM Raineri<sup>1</sup>, Marion Humbert<sup>1</sup>, Josef Jägerstedt<sup>2,3</sup>, Margaret Bojarlind<sup>2,3</sup>, Kristina Nilsson<sup>2,3</sup>, Malin Flodström-Tullberg<sup>1</sup>, Terezia Pincikova<sup>2,3,b</sup>, Johan K. Sandberg<sup>1,b</sup>

<sup>1</sup>Center for Infectious Medicine, Department of Medicine, Karolinska Institutet, Stockholm, Sweden. <sup>2</sup>Division of Pediatrics, Department of Clinical Science, Intervention and Technology, Karolinska Institutet, Stockholm, Sweden. <sup>3</sup>Stockholm CF Center, Karolinska University Hospital Huddinge, Stockholm, Sweden.

Address correspondence to: Dr. Johan K. Sandberg, CIM, Department of Medicine, Karolinska Institutet, Alfred Nobels Allé 8, 14152 Stockholm, Sweden. E-mail: [johan.sandberg@ki.se](mailto:johan.sandberg@ki.se); or to Dr. Terezia Pincikova, Stockholm CF Center, Albatross, K56, Karolinska University Hospital Huddinge, 14186 Stockholm, Sweden. E-mail: [terezia.pincikova@ki.se](mailto:terezia.pincikova@ki.se)

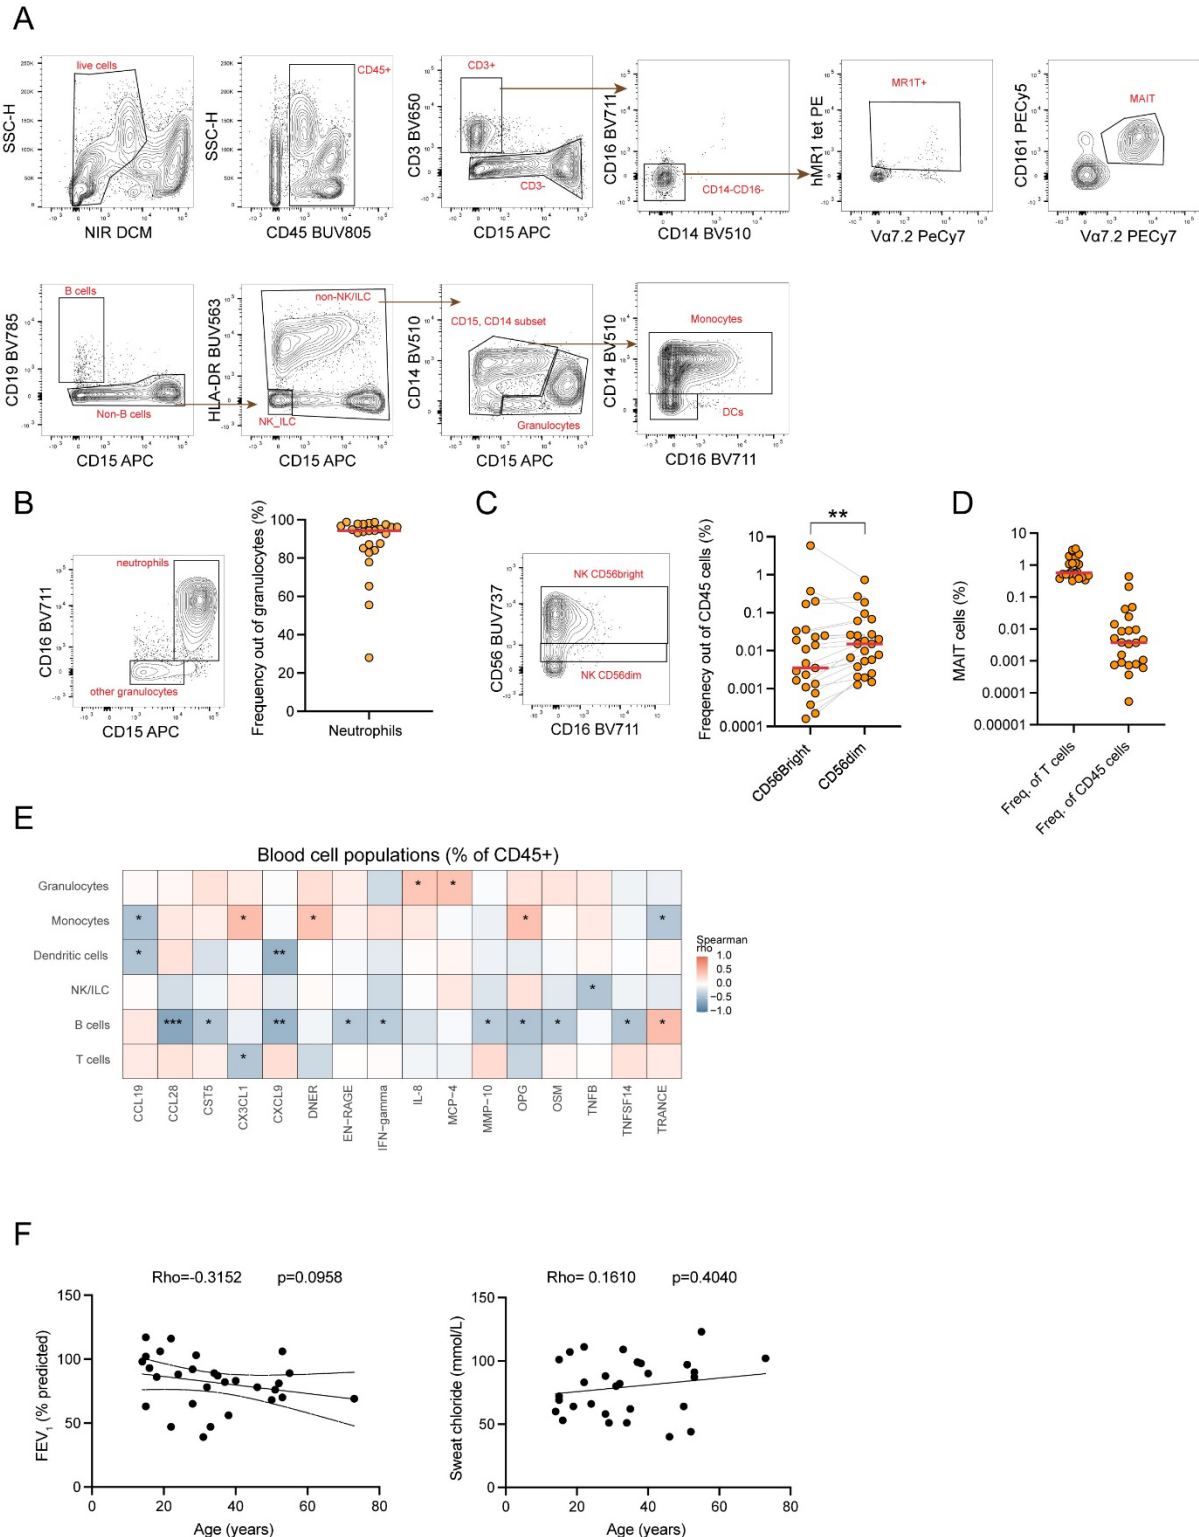

**Supplemental Figure 1. Immune cell gating strategy and baseline correlations in sputum and blood. (A)** Gating strategy for identification of major immune cell populations in sputum and blood. Representative plots from sputum samples shown. **(B)** Flow cytometry plot and scatter dot plot showing neutrophil percentages within the granulocyte population in sputum at baseline. **(C)**

Flow cytometry plot and scatter dot plot showing CD56<sup>bright</sup> and CD56<sup>dim</sup> NK cell percentages in CD45<sup>+</sup> sputum cells at baseline (scale is logarithmic) (Wilcoxon test \*p<0.05, \*\*p<0.01). **(D)** Scatter dot plot showing MAIT cell percentages among total T cells and CD45<sup>+</sup> cells in sputum. Scale is logarithmic. **(E)** Heatmap of Spearman correlations between blood immune cell populations determined by flow cytometry and plasma proteome markers at baseline (\*p<0.05, \*\*p<0.01, \*\*\*p<0.001). **(F)** Spearman correlation plots between age and FEV1 (% predicted) (left) and sweat chloride concentration (mmol/L) (right), at baseline. Red line represents median in panels **(B-D)**.

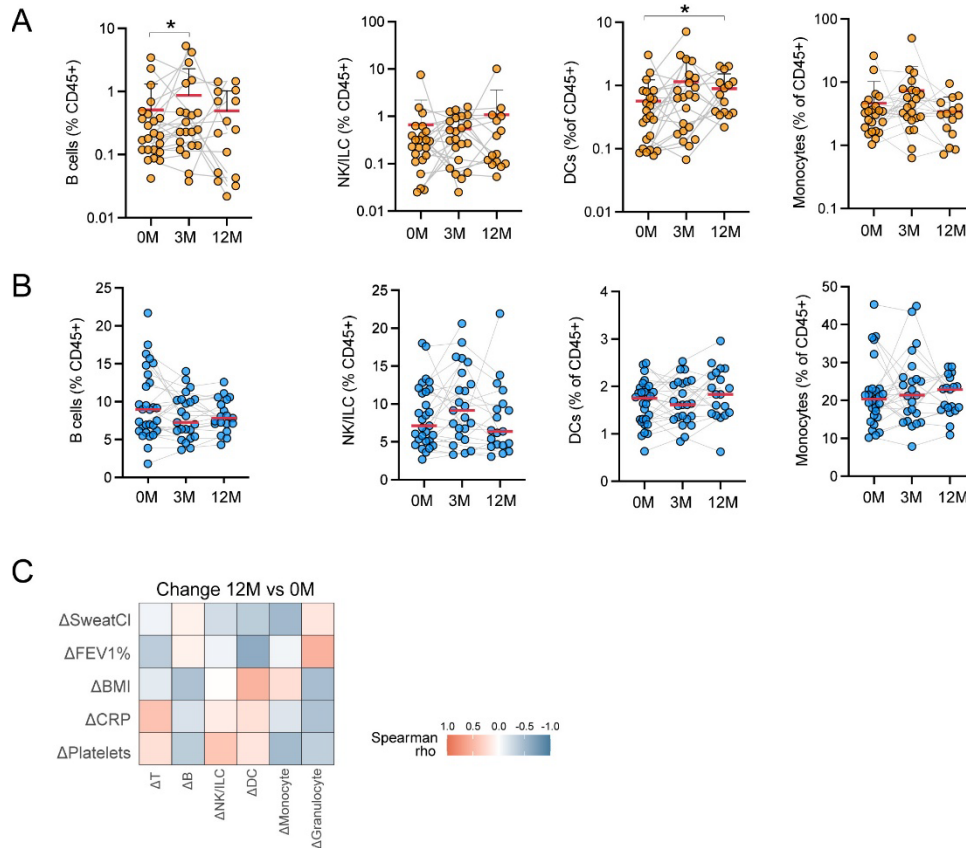

**Supplemental Figure 2. ETI treatment effects on the immune cell compartment and correlations with clinically relevant parameters. (A)** Scatter dot plots of changes in B cell, NK/ILC, DC and monocyte percentages in the sputum of pwCF during ETI. Scale is logarithmic (Wilcoxon test,  $*p < 0.05$ ). **(B)** Scatter dot plots of changes in B cell, NK/ILC, DC and monocyte percentages in the blood of pwCF during ETI **(C)** Heatmap showing Spearman correlations between change ( $\Delta$ ) in clinically relevant parameters and change in cell frequencies in the sputum after 12 months of ETI treatment ( $n=9$ ). Red line represents median in panels **(A)** and **(B)**.

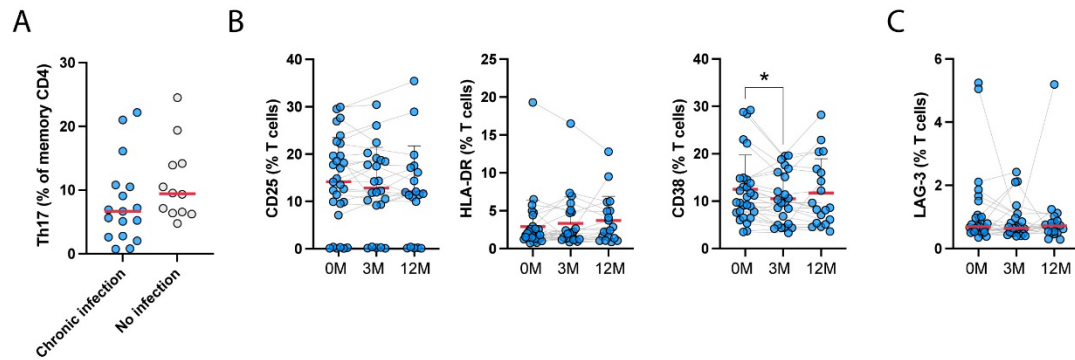

**Supplemental Figure 3. ETI treatment effects on peripheral blood T cell subsets and activation.** (A) Scatter dot plot showing baseline blood Th17 cell frequencies as percentage of memory CD4 T cells in pwCF with or without chronic infection (Mann-Whitney test). (B) Scatter dot plots showing changes in T cell activation markers CD25, HLA-DR, and CD38 in T cells during ETI treatment (Wilcoxon test,  $*p < 0.05$ ). (C) Scatter dot plot showing changes in LAG-3 expression in T cells during ETI treatment. Red line represents median.

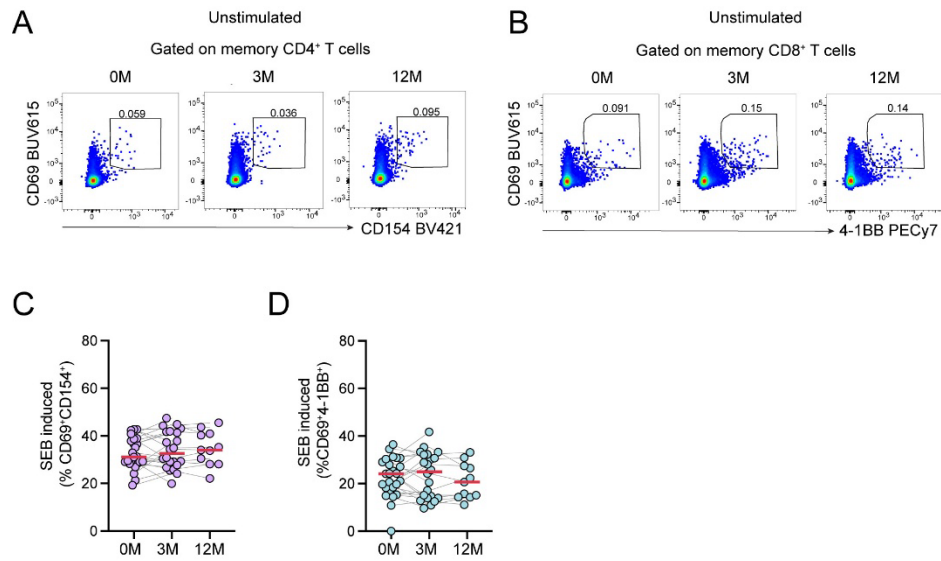

**Supplemental Figure 4. Activation-induced marker (AIM) assay to assess antigen-specific T cell responses during ETI treatment.** (A) Representative flow cytometry plots showing gating of IAV-specific CD4 T cells under unstimulated conditions at baseline (0M), 3 months (3M), and 12 months (12M) of ETI treatment. (B) Representative flow cytometry plots showing gating of IAV-specific CD8 T cells under unstimulated conditions at baseline, 3 months, and 12 months of ETI treatment. (C) Scatter dot plot showing SEB-induced CD4 T cell responses during ETI. (D) Scatter dot plot showing SEB-induced CD8 T cell responses during ETI. Red line represents median.

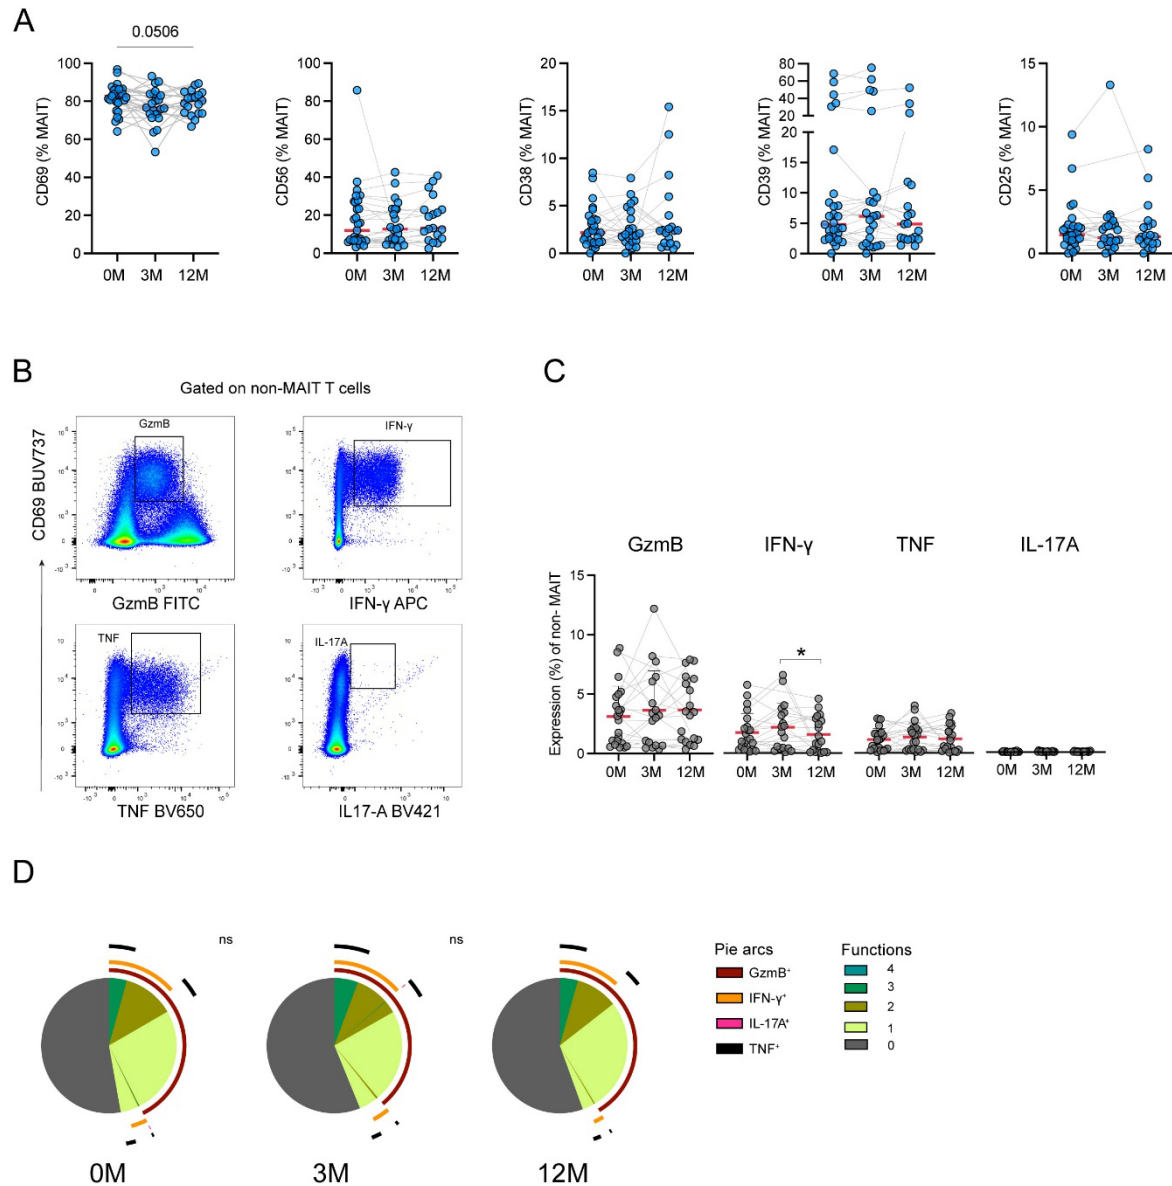

**Supplemental Figure 5. MAIT cell phenotype and conventional T cell function following stimulation with *Pseudomonas aeruginosa* during ETI treatment.** (A) Scatter dot plot showing changes in MAIT cell phenotypic marker expression in the blood of pwCF during ETI treatment (Wilcoxon test  $*p < 0.05$ ). (B) Representative flow cytometry plots showing conventional non-MAIT T cell responses (Gzmb, IFN- $\gamma$ , TNF, IL-17A) following stimulation with *Pseudomonas aeruginosa* (MOI=50). (C) Scatter dot plots quantifying conventional non-MAIT T cell responses to *Pseudomonas aeruginosa* (MOI=50) during ETI treatment (Wilcoxon test,  $*p < 0.05$ ). (D) Pie charts depicting polyfunctionality of conventional T cells in response to *Pseudomonas aeruginosa* (MOI=50) during ETI treatment (permutation test, ns=non-significant). Pie arc colors represent cytokine markers. Pie coloring indicates number of functions (0-4) ( $n=20-24$ ). Red line represents median in panels (A) and (C).

**Supplemental Table 1.** List of antibodies used for surface flow cytometry staining.

| <b>Antigen</b>    | <b>Fluorochrome</b> | <b>Clone</b> | <b>Provider</b>            |
|-------------------|---------------------|--------------|----------------------------|
| CD3               | BV650               | OKT3         | BioLegend                  |
| CD3               | BUV805              | SK7          | BD Biosciences             |
| CD8               | BUV395              | SK7          | BD Biosciences             |
| CD8               | BV570               | RPA-T8       | BioLegend                  |
| CD4               | BB700               | SK3          | BD Biosciences             |
| Va7.2             | PE-Cy7              | 3C10         | BioLegend                  |
| Va7.2             | APC                 | 3C10         | BioLegend                  |
| PD-1              | FITC                | EH12.2H7     | BioLegend                  |
| PD-1              | BV750               | EH12.2H7     | BioLegend                  |
| CD16              | BV711               | 3G8          | BioLegend                  |
| CD193             | BV605               | 5E8          | BioLegend                  |
| CD19              | BV785               | HIB19        | BioLegend                  |
| CD19              | V500                | HIB19        | BD Biosciences             |
| CD14              | V500                | M5E2         | BD Biosciences             |
| CD15              | APC                 | W6D3         | BioLegend                  |
| CD161             | PE-Cy5              | DX10         | BD Biosciences             |
| CD103             | BUV395              | Ber-ACT8     | BD Biosciences             |
| CD69              | AF700               | FN50         | BD Biosciences             |
| CD69              | BUV615              | FN50         | BD Biosciences             |
| CD27              | BUV615              | M-T271       | BD Biosciences             |
| CD127             | BUV661              | HIL-7R-M21   | BD Biosciences             |
| CD39              | BUV496              | TU66         | BD Biosciences             |
| CD56              | BUV737              | NCAM16.2     | BD Biosciences             |
| CD45              | BUV805              | H130         | BD Biosciences             |
| CD62L             | BV750               | SK11         | BD Biosciences             |
| HLA-DR            | BUV563              | G46-6        | BD Biosciences             |
| CD38              | BV421               | HIT2         | BioLegend                  |
| CD25              | BV711               | BC96         | BioLegend                  |
| TIM-3             | BV785               | F38-2E2      | BioLegend                  |
| LAG-3             | AF700               | T47-530      | BD Biosciences             |
| CTLA-4            | PE/Dazzle594        | BNI3         | BioLegend                  |
| CD45RA            | BV570               | HI100        | BioLegend                  |
| CCR6              | BUV737              | 11A9         | BD Biosciences             |
| CCR7              | APC-Cy7             | G043H7       | BioLegend                  |
| CXCR3             | BV650               | G025H7       | BioLegend                  |
| CXCR5             | BB515               | RF8B2        | BD Biosciences             |
| Live/Dead Near IR | N/A                 | N/A          | Invitrogen                 |
| Live/Dead AQUA    | N/A                 | N/A          | Invitrogen                 |
| 5-OP-RU-hMR1      | PE                  | N/A          | NIH tetramer Core Facility |



**Supplemental Table 2.** List of antibodies used for intracellular flow cytometry staining.

| <b>Antigen</b> | <b>Fluorochrome</b> | <b>Clone</b> | <b>Provider</b> |
|----------------|---------------------|--------------|-----------------|
| IL-17A         | BV605               | BL168        | BioLegend       |
| IL-10          | PE-CF594            | JES3-19F1    | BD Biosciences  |
| IFN- $\gamma$  | PE                  | B27          | BioLegend       |
| Granzyme B     | FITC                | GB11         | BioLegend       |
| TNF            | BV650               | MAb11        | BD Biosciences  |
| IL-2           | PE-CF594            | 5344.111     | BD Biosciences  |
| CD154          | BV421               | 24-31        | BioLegend       |
| CD137          | PE-Cy7              | 4B4-1        | BioLegend       |
| FOXP3          | AF647               | 206D         | BioLegend       |
| TCF1/TCF7      | AF488               | C63D9        | Cell Signaling  |
| T-bet          | PeCy7               | eBio4B10     | Invitrogen      |
